# Supplementary material for: Expression of putative targets of immunotherapy in acute myeloid leukemia and healthy tissues
Source: PubMed Central journal article supplement (PMC4013200; doi:10.1038/leu.2014.14), 2014-01-28
Supplement: NIHMS560182-supplement-1.pdf [file NIHMS560182-supplement-1.pdf]

## **Supplemental Table of Contents**

Supplemental Methods. FACS of leukemic populations, RNA amplification, and qRT-PCR of sorted populations

Table S1. List of 65 known and potential acute myeloid leukemia-associated antigens.

Table S2. Clinical annotation of 48 AML patients.

Table S3. AML mutations in our AML population.

Table S4. RNA integrity numbers (RIN).

Table S5. Normal organ tissue information.

Table S6. Antigen expression in sorted leukemia cell populations of 8 AML patients.

Figure S1. Expression of leukemia-associated antigens (LAA) in K562.

Figure S2. Antigen expression in FLT3-ITD mutated AML.

Figure S3. RNA integrity numbers versus expression of common housekeeping genes.

Figure S4. Peripheral blood (PB) versus bone marrow (BM) from the same patient.

## Supplemental Methods

Eight (8) AML PB samples were further characterized by sorting into leukemic blast, enriched stem cell, and leukemia-negative populations.

Up to 50 million cells from each of the 8 patients were stained with the following antibodies from Biolegend (San Diego, CA) with manufacturer's recommended concentration: APC CD13, PE CD33, PerCP/Cy5.5 CD34, BV 711 CD38, APC/Cy7 CD45, PE/Cy7 CD117, BV 421 CD123, and Alexa Fluor 700 HLA-DR in the dark at room temperature for 30 minutes.

Another set of up to 50 million cells from each of the 8 patients were stained with: PerCP/Cy5.5 CD34, BV 711 CD38, APC/Cy7 CD45RA, CD90, CD96, BV 421 CD123, PE TIM-3, and FITC Lineage (CD3, CD14, CD16, CD19, CD20, CD56) markers (Biolegend, San Diego, CA), and Alexa Fluor 647 CD96 (ABD Serotec, Raleigh, NC) in the dark at room temperature for 30 minutes.

Cells were then washed twice with cell staining buffer (Biolegend, San Diego, CA), suspended in 200uL cell staining buffer, and analyzed on the BD FACSaria III cell sorter (BD Biosciences, San Jose, CA). Leukemic blasts were identified based on available clinical markers, and a leukemia-negative population selected based on negativity of leukemic markers were sorted into cold RPMI 1600 with 40% FBS. Lineage negative (Lin-) CD34 positive CD38 negative cells were sorted into cold RPMI 1600 with 40% FBS.

Sorted cell populations were spun down at 1600rpm for 10 minutes and RNA and DNA was isolated using AllPrep Mini Kits (Qiagen, Valencia, CA) according to per manufacturer's protocol. Due to the low yield of RNA from these sorted populations, a pre-amplification step with primer mix (Qiagen, Valencia, CA) intended for use with our custom-designed arrays was performed before reverse transcription to amplify targets of interest according to manufacturer's protocol. qRT-PCR was performed according to the protocol described in the manuscript, and each population from each sample was run in triplicate. Fold change values were calculated using the comparative C(t) method using the geometric mean of 3 housekeeping genes that were expressed.

Table S1. List of 65 known and potential acute myeloid leukemia-associated antigens.

| Antigen          | Full Gene Name                                              | UniGene   | GenBank      |
|------------------|-------------------------------------------------------------|-----------|--------------|
| WT1              | Wilms tumor 1                                               | Hs.591980 | NM_000378    |
| PRAME            | Preferentially expressed antigen in melanoma                | Hs.30743  | NM_006115    |
| HMMR (RHAMM)     | Hyaluronan-mediated motility receptor                       | Hs.740467 | NM_012484    |
| PRTN3 (PR3)      | Proteinase 3                                                | Hs.928    | NM_002777    |
| BIRC5 (survivin) | Baculoviral IAP repeat containing 5                         | Hs.744872 | NM_001168    |
| TERT (hTERT)     | Telomerase reverse transcriptase                            | Hs.492203 | NM_198253    |
| TYR              | Tyrosinase                                                  | Hs.503555 | NM_000372    |
| BCL2             | B-cell CLL/lymphoma 2                                       | Hs.150749 | NM_000633    |
| RPSA             | Ribosomal protein SA                                        | Hs.449909 | NM_002295    |
| FLT3             | Fms-related tyrosine kinase 3                               | Hs.507590 | NM_004119    |
| CA9 (G250/CAIX)  | Carbonic anhydrase IX                                       | Hs.63287  | NM_001216    |
| MAGEA1           | Melanoma antigen family A, 1                                | Hs.72879  | NM_004988    |
| MAGEA3 (A6)      | Melanoma antigen family A, 3                                | Hs.417816 | NM_005362    |
| MAGEB2           | Melanoma antigen family B, 2                                | Hs.113824 | NM_002364    |
| MAGEC1           | Melanoma antigen family C, 1                                | Hs.132194 | NM_005462    |
| CCNA1            | Cyclin A1                                                   | Hs.417050 | NM_003914    |
| CCNB1            | Cyclin B1                                                   | Hs.23960  | NM_031966    |
| CCNE1            | Cyclin E1                                                   | Hs.244723 | NM_001238    |
| EXOSC5           | Exosome component 5                                         | Hs.283741 | NM_020158    |
| NUDCD1           | Nucleic acid domain containing 1                            | Hs.380291 | NM_032869    |
| RGS5             | Regulator of G-protein signaling 5                          | Hs.24950  | NM_003617    |
| MSLN             | Mesothelin                                                  | Hs.408488 | NM_005823    |
| DNAJC2 (MPP11)   | DnaJ (HSP40) homolog, subfamily C, member 2                 | Hs.558476 | NM_014377    |
| HOXA9            | Homeobox A9                                                 | Hs.659350 | NM_152739    |
| BAGE             | B melanoma antigen                                          | Hs.545789 | NM_001187    |
| MCL1             | Myeloid cell leukemia sequence 1                            | Hs.632486 | NM_021960    |
| KRAS             | V-Ki-ras22 Kirsten rat sarcoma viral oncogene homolog       | Hs.505033 | NM_004985    |
| NRAS             | Neuroblastoma RAS viral (v-ras) oncogene homolog            | Hs.486502 | NM_002524    |
| HRAS             | V-Ha-ras harvey rat sarcoma viral oncogene homolog          | Hs.37003  | NM_005343    |
| MUC1             | Mucin 1, cell surface associated                            | Hs.89603  | NM_001018016 |
| CALR3            | Calreticulin 3                                              | Hs.304020 | NM_145046    |
| AURKA            | Aurora kinase A                                             | Hs.250822 | NM_003600    |
| AURKB            | Aurora kinase B                                             | Hs.442658 | NM_004217    |
| RAGE             | Renal tumor antigen                                         | Hs.104119 | NM_014226    |
| CTAGE5           | CTAGE family, member 5                                      | Hs.509200 | NM_005930    |
| SYCP1            | Synaptonemal complex protein 1                              | Hs.112743 | NM_003176    |
| CALML4           | Calmodulin-like 4                                           | Hs.709550 | NM_033429    |
| SAGE1            | Sarcoma antigen 1                                           | Hs.195292 | NM_018666    |
| XAGE1A           | X antigen family, member 1A                                 | Hs.112208 | NM_001097592 |
| GAGE1            | G antigen 1                                                 | Hs.632815 | NM_001468    |
| SPANXA2          | SPANX family, member A2                                     | Hs.334464 | NM_145662    |
| SPANXC           | SPANX family, member C                                      | Hs.558533 | NM_022661    |
| DDX43 (HAGE)     | DEAD (Asp-Glu-Ala-Asp) box polypeptide 43                   | Hs.125507 | NM_018665    |
| SPAG9            | Sperm associated antigen 9                                  | Hs.463439 | NM_003971    |
| NPM1             | Nucleophosmin (nucleolar phosphoprotein B23, numatrin)      | Hs.557550 | NM_199185    |
| PASD1            | PAS domain containing 1                                     | Hs.160594 | NM_173493    |
| BAALC            | Brain and acute leukemia, cytoplasmic                       | Hs.533446 | NM_024812    |
| SSX2IP           | Synovial sarcoma, X breakpoint 2 interacting protein        | Hs.22587  | NM_014021    |
| HOXB4            | Homeobox B4                                                 | Hs.664706 | NM_024015    |
| BMI1             | BMI1 polycomb ring finger oncogene                          | Hs.380403 | NM_005180    |
| DNAJA1           | DnaJ (Hsp40) homology, subfamily A, member 1                | Hs.445203 | NM_001539    |
| RPS23            | Ribosomal protein S23                                       | Hs.144835 | NM_001025    |
| EEF1G            | Eukaryotic translation elongation factor 1 gamma            | Hs.144835 | NM_001404    |
| CDC25C           | Cell division cycle 25 homolog C (S. pombe)                 | Hs.656    | NM_001790    |
| ING3             | Inhibitor of growth family, member 3                        | Hs.489811 | NM_198267    |
| HBG2             | Hemoglobin, gamma G                                         | Hs.302145 | NM_000184    |
| REPIN1           | Replication inhibitor 1                                     | Hs.647086 | NM_013400    |
| PRKCSH           | Protein kinase C substrate 80K-H                            | Hs.610830 | NM_002743    |
| MTHFD1           | Methylenetetrahydrofolate dehydrogenase (NADP+ dependent) 1 | Hs.652308 | NM_005956    |
| USP33            | Ubiquitin specific peptidase 33                             | Hs.480597 | NM_201624    |
| NSD1             | Nuclear receptor binding SET domain protein 1               | Hs.106861 | NM_022455    |
| HN1L             | Hematological and neurological expressed 1-like             | Hs.513261 | NM_144570    |
| RHOXF2           | Rhox homeobox family, member 2                              | Hs.567620 | NM_032498    |
| RHOXF1           | Rhox homeobox family, member 1                              | Hs.644617 | NM_139282    |
| AURKC            | Aurora kinase C                                             | Hs.98338  | NM_003160    |

Table S2. Clinical Annotation of 48 AML Patients.

| Patient Code | PB or BM | Age | Sex | Cytogenetics Risk | Cytogenetic Details                                        | FLT-ITD mutated | FLT3-TKD mutated | NPM1 mutated | IDH1 mutated | IDH1 mutated | Subtype      | WBC @ Dx | %Blasts |
|--------------|----------|-----|-----|-------------------|------------------------------------------------------------|-----------------|------------------|--------------|--------------|--------------|--------------|----------|---------|
| AML1         | PB       | 67  | F   | Adverse           | "complex" (2;12)                                           | N               | N                | N            | N            | N            |              |          |         |
| AML2         | PB       | 39  | M   | Adverse           | Complex                                                    | N               | Yes              | N            | N            | N            | M1           | 2.5      | 54      |
| AML3         | PB       | 32  | F   | Favorable         | 8,21                                                       | N               | N                | N            | N            | N            |              |          |         |
| AML4         | PB       | 34  | F   | Intermediate      | 8q24 [20]                                                  | N               | N                | N            | N            | N            | M1           | 5.7      | 56      |
| AML5         | PB       | 51  | F   | Intermediate      | 47,XX,+21[1]/46,XX[19]                                     | N               | N                | Yes          | Yes          | N            | AML NOS      | 2.2      | ND      |
| AML6         | PB       | 30  | M   | Intermediate      | 46XY [20]                                                  | N               | N                | N            | N            | N            | M1           | 34.5     | 89      |
| AML7         | PB       | 39  | M   | Intermediate      | Normal                                                     | Yes             | N                | N            | N            | N            | M4           | 55.8     | 88      |
| AML8         | PB       | 32  | F   | Favorable         | -X, t(8,21) [20]                                           | N               | N                | N            | N            | N            |              |          |         |
| AML9PB       | PB       | 64  | F   | Intermediate      | 46,XX[20]                                                  | N               | N                | N            | N            | N            | M5           | 74.2     | ND      |
| AML10PB      | PB       | 48  | M   | Favorable         | 46,XY,inv(16)(p13.1q22)[13]/46,XY[7]                       | N               | N                | N            | N            | N            |              | 24.6     | 81.9    |
| AML11PB      | PB       | 65  | M   | Intermediate      | 46XY [20]                                                  | N               | N                | Yes          | N            | N            | M5           | 97.1     | 54.3    |
| AML12PB      | PB       | 60  | M   | Intermediate      | 46XY [20]                                                  | N               | N                | N            | N            | N            |              |          |         |
| AML13        | PB       | 65  | M   | Adverse           | 45XY, -7 [15]                                              | N               | N                | N            | N            | N            |              |          |         |
| AML14        | PB       | 52  | M   | Intermediate      | 47XY, +21 [3]                                              | N               | N                | N            | N            | N            | M2           | 5.3      | 52      |
| AML15        | PB       | 58  | F   | Intermediate      | 46XX [20]                                                  | N               | N                | Yes          | N            | N            |              |          |         |
| AML16        | PB       | 61  | F   | Intermediate      | 46XX [20]                                                  | N               | N                | N            | N            | N            | M5           |          |         |
| AML17        | PB       | 59  | F   | Intermediate      | 46XX [20]                                                  | N               | N                | N            | N            | N            |              |          |         |
| AML18        | PB       | 44  | F   | Intermediate      | 47XX,+8[15]                                                | Yes             | N                | N            | N            | N            |              |          |         |
| AML19        | PB       | 70  | F   | Adverse           | Complex                                                    | N               | N                | Yes          | N            | N            |              |          |         |
| AML20        | PB       | 39  | F   | Favorable         | t(8;21)                                                    | N               | N                | N            | N            | N            | M2           | 5        | 35      |
| AML21        | PB       | 56  | M   | Favorable         | 46,XY,t(15;17)(q24;q21)[17]/46,XY[3]                       | N               | N                | N            | N            | N            | M3           | 4.5      | 11.6    |
| AML22        | PB       | 40  | F   | Intermediate      | Normal                                                     | Yes             | N                | Yes          | N            | N            | M1           | 38.8     | 72      |
| AML23        | PB       | 36  | F   | Favorable         | t(15;17)                                                   | Yes             | N                | N            | N            | N            | M3           | 22.4     | 76      |
| AML24        | PB       | 31  | M   | Intermediate      | t(6;9)                                                     | Yes             | N                | N            | N            | N            | M2           | 7        | 47      |
| AML25        | PB       | 57  | F   | Intermediate      | t(6;12;8)                                                  | N               | N                | N            | N            | N            | M2           | 11.4     | 58      |
| AML26        | PB       | 31  | F   | Intermediate      | Normal                                                     | N               | N                | N            | N            | N            | M2           | 7.9      | 25      |
| AML27        | PB       | 51  | F   | Adverse           | Complex                                                    | N               | N                | N            | N            | N            | M5           | 19.5     | 52      |
| AML28        | PB       | 57  | F   | Intermediate      | Normal                                                     | N               | N                | Yes          | N            | N            | M5           | 61.9     | 73      |
| AML29        | PB       | 24  | M   | Intermediate      | +21 [19]                                                   | N               | N                | N            | N            | N            | M1           | 83.4     | 100     |
| AML30        | PB       | 55  | F   | Intermediate      | Normal                                                     | Yes             | N                | N            | N            | N            |              | 1.1      | 63      |
| AML31        | BM       | 76  | M   | Intermediate      | 46XY [20]                                                  | N               | N                | N            | N            | N            | MDS/AML      |          |         |
| AML32        | BM       | 56  | F   | Adverse           | -5q [72.5%]                                                | N               | N                | N            | N            | N            | MDS/AML      |          |         |
| AML33        | BM       | 61  | M   | Intermediate      | 46XY [20]                                                  | N               | N                | N            | N            | Yes          |              |          |         |
| AML34        | BM       | 60  | M   | Intermediate      | 46XY [20]                                                  | N               | N                | Yes          | Yes          | N            | TherapyR     | 21.3     | 53      |
| AML35        | BM       | 56  | F   | Adverse           | Complex                                                    | N               | N                | N            | N            | N            |              |          |         |
| AML36        | BM       | 69  | M   | Intermediate      | 46XY [20]                                                  | N               | N                | N            | N            | Yes          |              |          |         |
| AML37        | BM       | 68  | M   | Adverse           | Complex                                                    | N               | N                | N            | N            | N            |              |          |         |
| AML38        | BM       | 68  | F   | Intermediate      | 47XX,+8[15]                                                | N               | Yes              | N            | N            | Yes          |              |          |         |
| AML9BM       | BM       | 64  | F   | Intermediate      | 46,XX[20]                                                  | N               | N                | N            | N            | N            | M5           | 74.2     | 89      |
| AML10BM      | BM       | 48  | M   | Favorable         | 46,XY,inv(16)(p13.1q22)[13]/46,XY[7]                       | N               | N                | N            | N            | N            |              | 24.6     | 99      |
| AML11BM      | BM       | 65  | M   | Intermediate      | 46XY [20]                                                  | N               | N                | Yes          | N            | N            | M5           | 97.1     | 39      |
| AML12BM      | BM       | 60  | M   | Intermediate      | 46XY [20]                                                  | N               | N                | N            | N            | N            |              |          |         |
| AML39        | BM       | 86  | M   | Intermediate      | add(2), +8                                                 | N               | N                | Yes          | N            | N            | Monocytic    |          | 78      |
| AML40        | BM       | 73  | M   | Intermediate      | 46,XY[cp4].nuc ish(ETV6x2)[100]                            | Yes             | N                | N            | N            | N            | TherapyR     |          | 64      |
| AML41        | BM       | 68  | M   | Adverse           | Complex                                                    | N               | N                | N            | N            | Yes          | Monocytic    |          | 56      |
| AML42        | BM       | 42  | M   | Intermediate      | 46XY [20]                                                  | N               | Yes              | N            | Yes          | N            | MultilinDysp |          | 83      |
| AML43        | BM       | 78  | M   | Intermediate      | 46XY [20]                                                  | N               | N                | N            | N            | Yes          | MDS/AML      |          | 40      |
| AML44        | BM       | 33  | F   | Favorable         | Inv16                                                      | N               | Yes              | N            | N            | N            |              |          | 33      |
| AML45        | BM       | 67  | F   | Adverse           | 46XX,der(4:12)(q10;q10),del9(q13),del(11)(q13q23),+Mar[20] | N               | N                | N            | N            | N            |              | 1.1      | 2       |
| AML46        | BM       | 50  | M   | Adverse           | 47XY,+4,3,7dmin[3]/46,XY,1,15dmin[15]                      | N               | Yes              | N            | N            | Yes          |              | 104      | 23      |
| AML47        | BM       | 25  | M   | Intermediate      | 46XY [20]                                                  | N               | N                | Yes          | Yes          | Yes          |              | 1.9      | 20      |
| AML48        | BM       | 34  | F   | Intermediate      | 46XX[20]                                                   | Yes             | N                | Yes          | N            | N            |              | 89.3     | 22      |

Table S3. AML mutations in our patient population. (A) Prevalence of mutations in our 48 AML samples. (B) Distribution of mutations with ascending age and cytogenetic classification.

FLT3-ITD and NPM1 mutations obtained from clinical information where available. FLT3-ITD typing performed by Levis laboratory at Johns Hopkins University (according to method described in Murphy KM *et al*<sup>1</sup>). Additional mutation data obtained by analyzing DNA from AML samples on qBiomarker Somatic Mutation PCR Array for human acute myeloid leukemia (Qiagen, Valencia, CA) according to manufacturer's instructions.

<sup>1</sup>Murphy KM, Levis M, Hafez MJ, Geiger T, Cooper LC, Smith BD, et al. Detection of FLT3 Internal Tandem Duplication and D835 Mutations by a Multiplex Polymerase Chain Reaction and Capillary Electrophoresis Assay. *Journal of Molecular Diagnostics* 2003 May; 5(2): 96-102

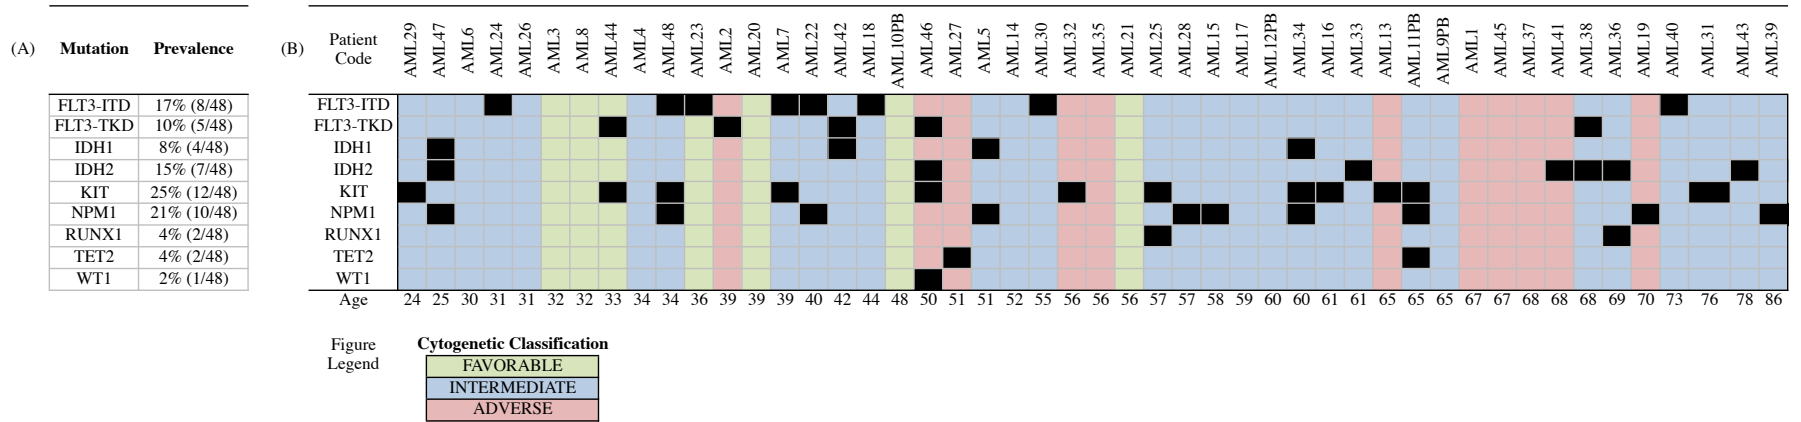

Table S4. RNA integrity numbers (RIN). (A) RINs of our 48 patients, healthy donor PB and BM, normal organ tissues, and K562 cell line. (B) Graphs of ribosomal peaks with RINs of 10, 7, 5.5, and 2.8. Based on integrity of ribosomal peaks, we used only samples with RINs  $\geq 7$  for reliable gene expression output.

| (A) Patient Code | Sample Type | RIN  |
|------------------|-------------|------|
| AML1             | PB          | 9.3  |
| AML2             | PB          | 9.0  |
| AML3             | PB          | 7.9  |
| AML4             | PB          | 9.5  |
| AML5             | PB          | 8.6  |
| AML6             | PB          | 7.6  |
| AML7             | PB          | 10.0 |
| AML8             | PB          | 7.2  |
| AML9PB           | PB          | 8.1  |
| AML10PB          | PB          | 9.7  |
| AML11PB          | PB          | 7.1  |
| AML12PB          | PB          | 8.1  |
| AML13            | PB          | 7.4  |
| AML14            | PB          | 7.5  |
| AML15            | PB          | 9.0  |
| AML16            | PB          | 9.6  |
| AML17            | PB          | 7.0  |
| AML18            | PB          | 7.3  |
| AML19            | PB          | 7.1  |
| AML20            | PB          | 8.9  |
| AML21            | PB          | 7.2  |
| AML22            | PB          | 8.7  |
| AML23            | PB          | 9.8  |
| AML24            | PB          | 7.0  |
| AML25            | PB          | 9.6  |
| AML26            | PB          | 8.8  |
| AML27            | PB          | 7.9  |
| AML28            | PB          | 7.4  |
| AML29            | PB          | 7.4  |
| AML30            | PB          | 7.2  |
| AML9BM           | BM          | 9.1  |
| AML10BM          | BM          | 8.5  |
| AML11BM          | BM          | 7.9  |
| AML12BM          | BM          | 7.6  |
| AML31            | BM          | 8.7  |
| AML32            | BM          | 7.4  |
| AML33            | BM          | 7.5  |
| AML34            | BM          | 8.5  |
| AML35            | BM          | 8.3  |
| AML36            | BM          | 9.7  |
| AML37            | BM          | 7.2  |
| AML38            | BM          | 7.6  |
| AML39            | BM          | 9.2  |
| AML40            | BM          | 7.9  |
| AML41            | BM          | 9.3  |
| AML42            | BM          | 7.8  |
| AML43            | BM          | 7.4  |
| AML44            | BM          | 7.0  |
| AML45            | BM          | 9.5  |
| AML46            | BM          | 9.2  |
| AML47            | BM          | 8.6  |
| AML48            | BM          | 10.0 |
| NPB1             | PB          | 10.0 |
| NPB2             | PB          | 9.8  |
| NPB3             | PB          | 10.0 |
| NPB4             | PB          | 9.0  |
| NPB5             | PB          | 9.8  |
| NPB6             | PB          | 9.9  |
| NPB7             | PB          | 10.0 |
| NPB8             | PB          | 9.8  |
| NPB9             | PB          | 10.0 |
| NPB10            | PB          | 10.0 |
| NBM1             | BM          | 7.0  |
| NBM2             | BM          | 7.0  |
| NBM3             | BM          | 9.6  |
| NBM4             | BM          | 7.6  |
| NBM5             | BM          | 8.1  |
| NBM6             | BM          | 8.2  |
| NBM7             | BM          | 8.5  |
| Whole Brain      | Tissue      | 7.8  |
| Lung             | Tissue      | 7.5  |
| Liver            | Tissue      | 7.4  |
| Heart            | Tissue      | 7.8  |
| Cerebellum       | Tissue      | 8.2  |
| Thyroid          | Tissue      | 7.1  |
| Colon            | Tissue      | 8.0  |
| Prostate         | Tissue      | 7.5  |
| Muscle           | Tissue      | 7.7  |
| Intestine        | Tissue      | 6.9  |
| Kidney           | Tissue      | 8.9  |
| Spleen           | Tissue      | 7.2  |
| K562             | Cell Line   | 10.0 |

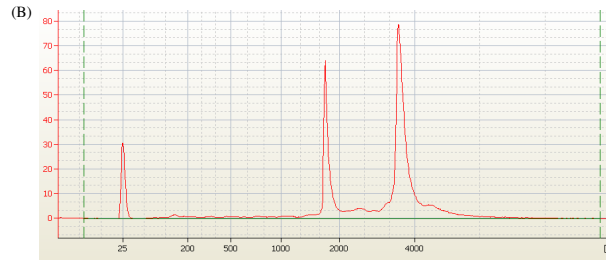

RIN = 10.0

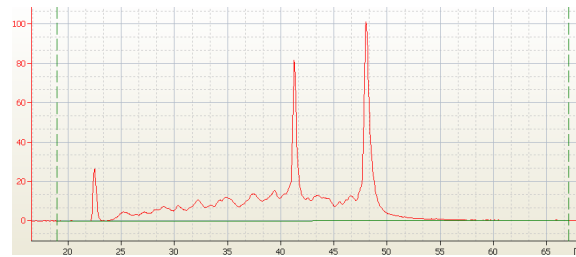

RIN = 7.0

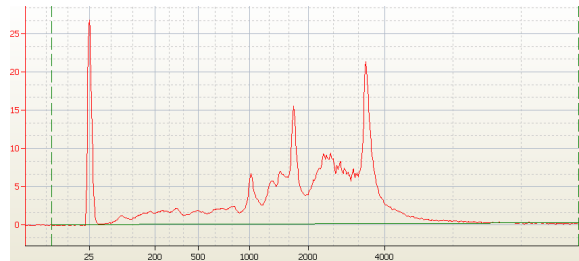

RIN = 5.5

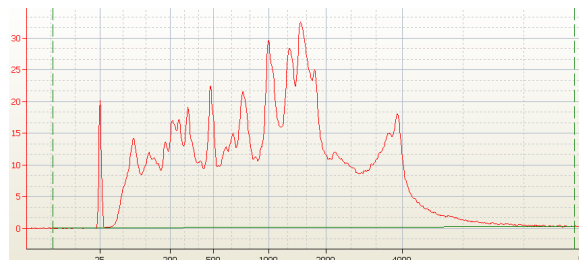

RIN = 2.8

Table S5. Normal organ tissue information.

Clontech  
 Human Total RNA Master Panel II  
 Catalog Number: 636643  
 Lot Number: 1112058A

| <i>Organ RNA</i> | <i>Source</i>                                      |
|------------------|----------------------------------------------------|
| Brain (whole)    | 43-year-old male Caucasian                         |
| Lung             | pooled from 3 male/female Caucasians, ages: 32-61  |
| Liver            | 51-year-old male Caucasian                         |
| Heart            | pooled from 3 male Caucasians; ages: 30-39         |
| Cerebellum       | pooled from 10 male/female Caucasians, ages: 22-68 |
| Thyroid gland    | pooled from 64 male/female Caucasians; ages 15-61  |
| Prostate         | pooled from 12 Caucasians; ages 20-58              |
| Skeletal Muscle  | pooled from 2 male/female Caucasians; ages 43-63   |
| Small Intestine  | pooled from 5 male/female Caucasians; ages 20-61   |
| Kidney           | 40-year-old female Caucasian                       |
| Spleen           | pooled from 15 male/female Caucasians; ages 22-69  |

All information taken from Clontech certificate of analysis dated 2/2/12

Clontech  
 Human Colon Total RNA  
 Catalog Number: 636553  
 Lot Number: 1005014

|                                        |                                                                      |
|----------------------------------------|----------------------------------------------------------------------|
| Normal human colon with mucosal lining | pooled from 5 male Asians; ages: 20-44, cause of death: sudden death |
|----------------------------------------|----------------------------------------------------------------------|

All information taken from Clontech certificate of analysis

Table S6. Antigen expression in sorted leukemia cell populations of 8 AML patients.

| Gene  | AML 14 |     |   |     | AML 23 |    |    |    | AML 24 |    |   |    | AML 25 |   |   |     | AML 27 |    |    |     | AML 28 |    |   |    | AML 29 |    |    |     | AML 30 |     |   |     |   |   |   |
|-------|--------|-----|---|-----|--------|----|----|----|--------|----|---|----|--------|---|---|-----|--------|----|----|-----|--------|----|---|----|--------|----|----|-----|--------|-----|---|-----|---|---|---|
|       | U      | B   | N | L   | U      | B  | N  | L  | U      | B  | N | L  | U      | B | N | L   | U      | B  | N  | L   | U      | B  | N | L  | U      | B  | N  | L   | U      | B   | N | L   | U | B | N |
| PRTN3 | -      | -   | - | ++  | ++     | +  | +  | ++ | +      | +  | - | +  | +      | + | - | +++ | +++    | ++ | +  | ++  | ++     | -  | - | ++ | -      | +  | ++ | +++ | -      | +++ | + | +++ |   |   |   |
| WT1   | +      | +   | - | ++  | ++     | ++ | ++ | ++ | ++     | ++ | - | +  |        |   |   |     | ++     | ++ | ++ | +++ |        |    |   |    | +      | ++ | -  | ++  | +++    | +++ | - | -   |   |   |   |
| HOXA9 |        |     |   |     |        |    |    |    | ++     | ++ | - | ++ |        |   |   |     |        |    |    |     | ++     | ++ | - | +  | -      | -  | -  | ++  | +++    | +++ | - | +++ |   |   |   |
| BAALC |        |     |   |     |        |    |    |    | +      | +  | + | ++ |        |   |   |     | +      | -  | -  | ++  |        |    |   |    |        |    |    |     | ++     | -   | - | +++ |   |   |   |
| CCNA1 |        |     |   |     | +++    | ++ | ++ | ++ | ++     | ++ | - | -  |        |   |   |     | ++     | ++ | +  | ++  |        |    |   |    |        |    |    |     |        |     |   |     |   |   |   |
| GAGE1 | -      | -   | - | ++  |        |    |    |    |        |    |   |    |        |   |   |     |        |    |    |     |        |    |   |    |        |    |    |     | -      | -   | - | ++  |   |   |   |
| KIT   | +      | +   | - | ++  |        |    |    |    |        |    |   |    |        |   |   |     |        |    |    |     |        |    |   |    |        |    |    |     | ++     | ++  | - | ++  |   |   |   |
| MEIS1 |        |     |   |     |        |    |    |    |        |    |   |    |        |   |   |     |        |    |    |     | +      | +  | - | +  |        |    |    |     | ++     | ++  | - | ++  |   |   |   |
| ERG   |        |     |   |     | +      | +  | +  | +  | ++     | ++ | - | ++ |        |   |   |     |        |    |    |     |        |    |   |    |        |    |    |     |        |     |   |     |   |   |   |
| HOXB4 |        |     |   |     |        |    |    |    |        |    |   |    |        |   |   |     |        |    |    |     |        |    |   |    |        |    |    |     | ++     | ++  | - | ++  |   |   |   |
| HBG2  | +++    | +++ | - | +++ |        |    |    |    |        |    |   |    |        |   |   |     |        |    |    |     |        |    |   |    |        |    |    |     |        |     |   |     |   |   |   |
| CD276 |        |     |   |     | +      | +  | +  | +  |        |    |   |    |        |   |   |     |        |    |    |     |        |    |   |    |        |    |    |     |        |     |   |     |   |   |   |
| PRAME |        |     |   |     |        |    |    |    |        |    |   |    |        |   |   |     | ++     | ++ | -  | +++ |        |    |   |    |        |    |    |     |        |     |   |     |   |   |   |

Figure  
Legends

| Leukemia Cell Populations |                                              |
|---------------------------|----------------------------------------------|
| U                         | Unsorted bulk leukemia                       |
| B                         | Leukemic blast population                    |
| N                         | Non-leukemia population                      |
| L                         | CD34+CD38-Lin- enriched stem cell population |

| Antigen expression in cell populations   |  |
|------------------------------------------|--|
| Only expressed in stem cell              |  |
| Only expressed in bulk leuk              |  |
| Highly expressed in stem cell.           |  |
| Homogenous thru all leukemia populations |  |
| Expressed in unsorted and stem cell      |  |

| Magnitude of over-expression (OE) |            |
|-----------------------------------|------------|
| +                                 | 10-50x OE  |
| ++                                | 50-500x OE |
| +++                               | <500x OE   |



Figure S1. Expression of leukemia-associated antigens (LAA) in K562. (A) Expression values from our custom array are highly reproducible. K562 was analyzed twice using different plates on different days. Antigen expression is highly similar between both runs. (B) Heat map of LAA expression in K562 normalized to median expression seen in healthy peripheral blood (PB). Light red indicates over-expression (OE) of 5-50x, red indicates OE of 50-500x, and bright red indicates OE of greater than 500x. K562 is a good positive control for most genes not expressed in AML PB or healthy PB.

Figure S2. Antigen expression in FLT3-ITD mutated AML. (A) RHAMM, PR3, Survivin, and PRAME are not associated with FLT3-ITD mutation status. (B) WT1 is strongly associated with FLT3-ITD mutation status.

Figure S3. RNA Integrity (RIN) versus expression of common housekeeping genes. Samples with lower RIN values trend towards higher C(t) values for these genes.

Figure S4. Peripheral blood (PB) versus bone marrow (BM) from the same patient. In 3/4 patients, PB showed same expression profile as BM; patient 12 had differing expression gene expression values for several genes between PB and BM.



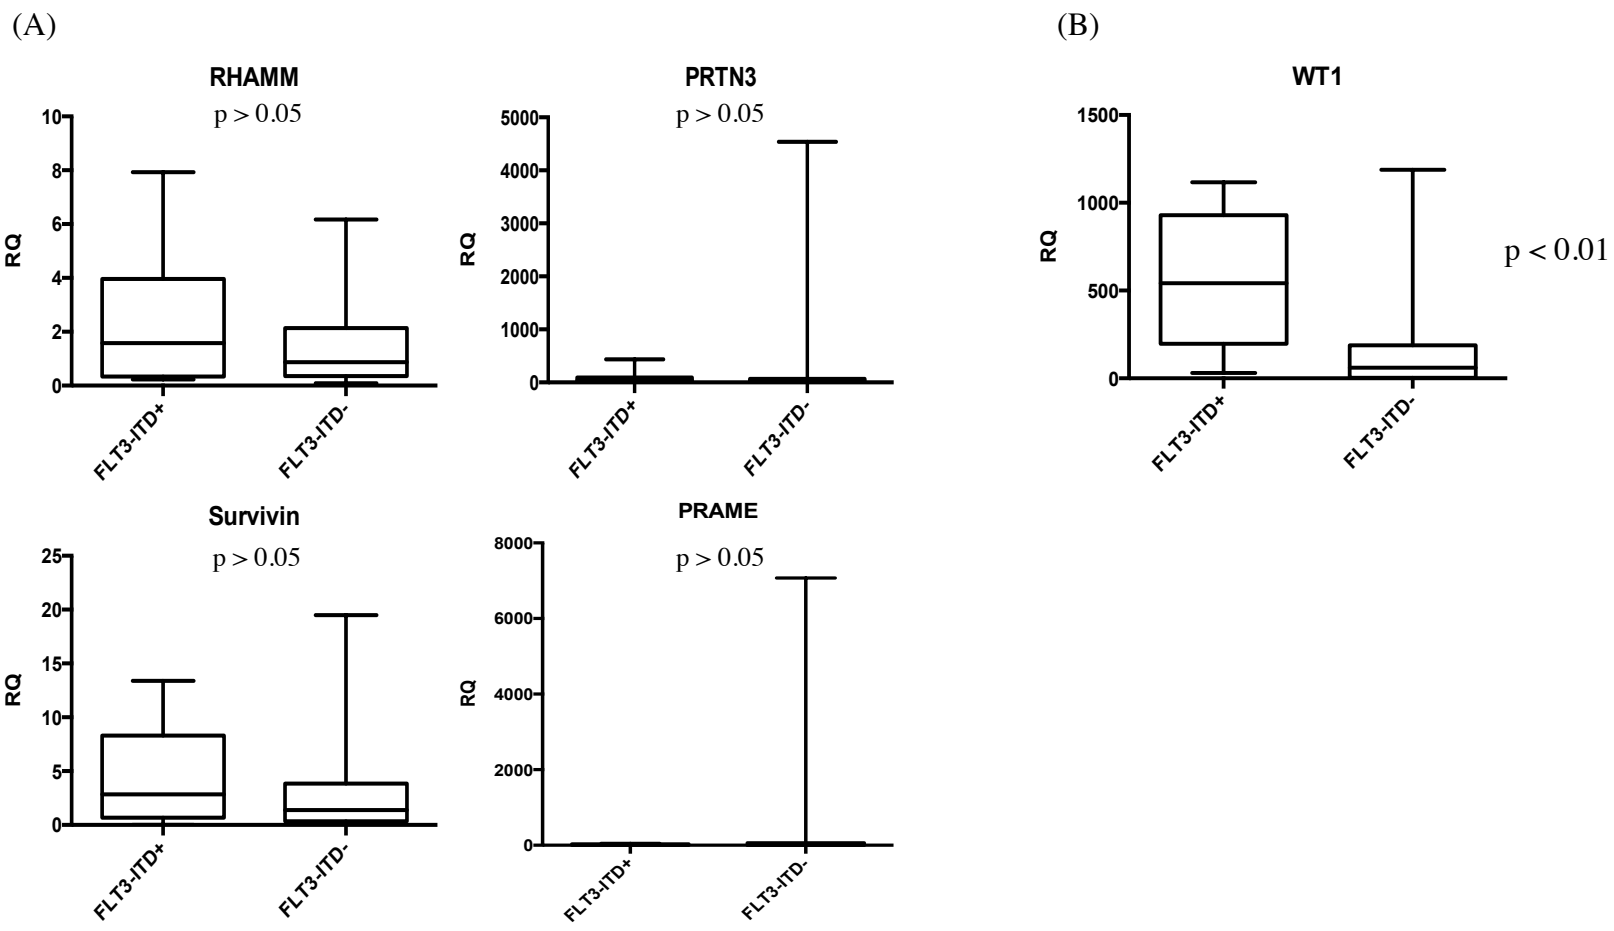

Figure S2

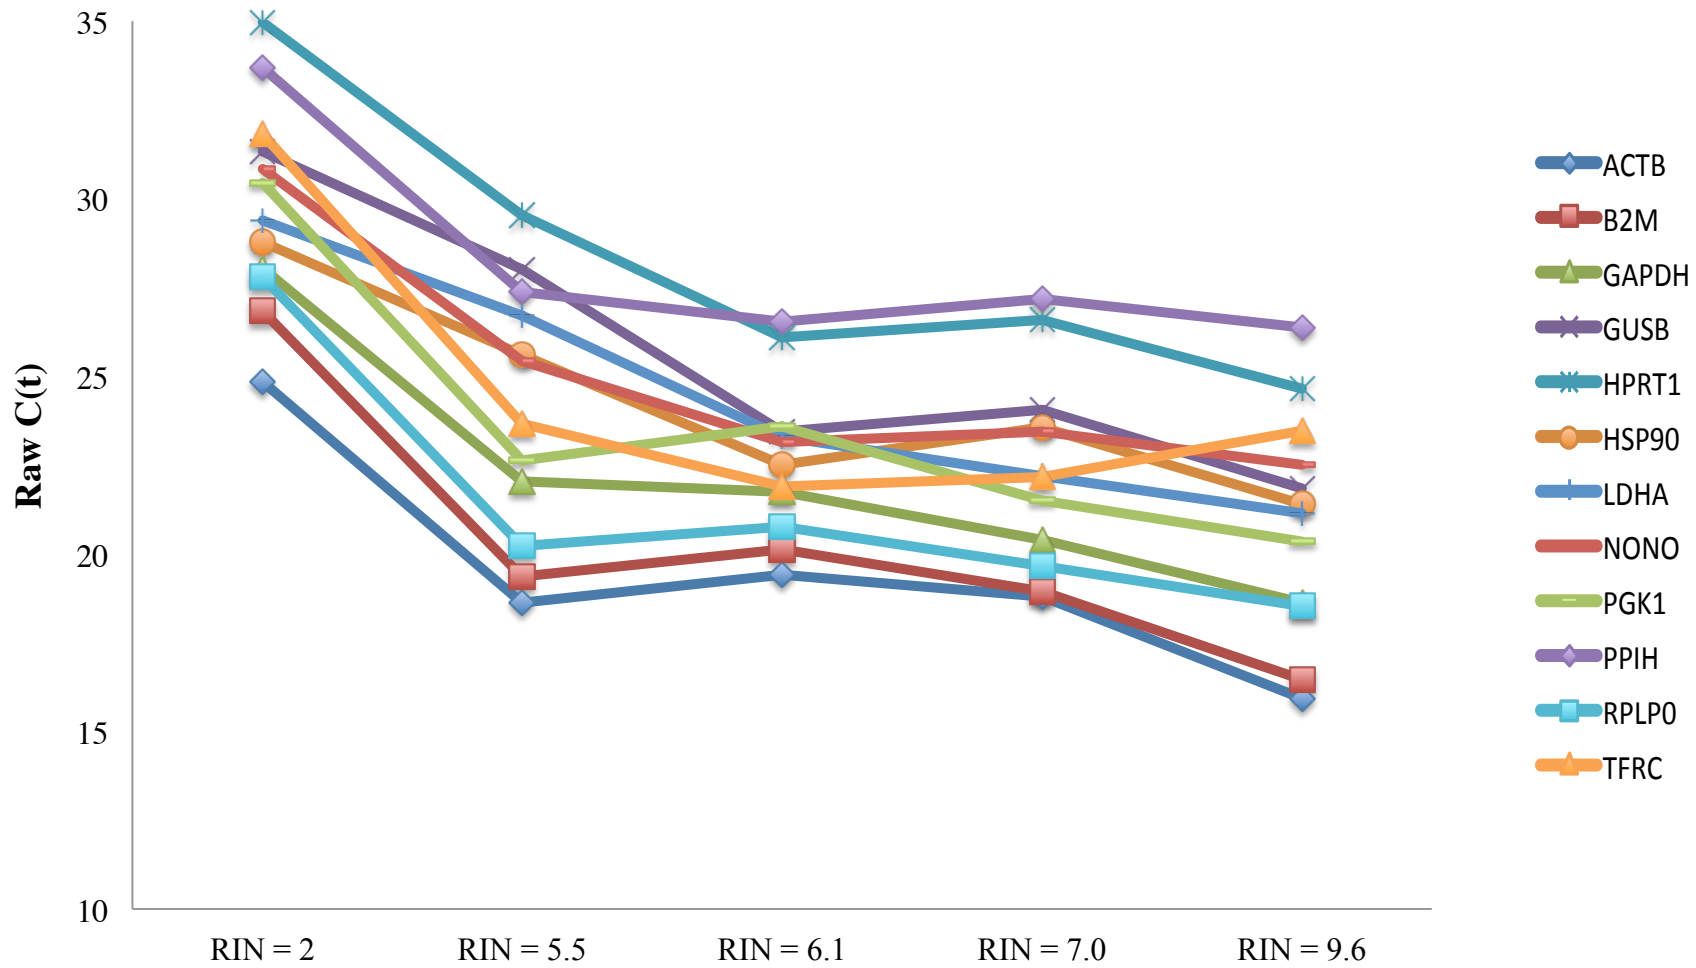

Figure S3

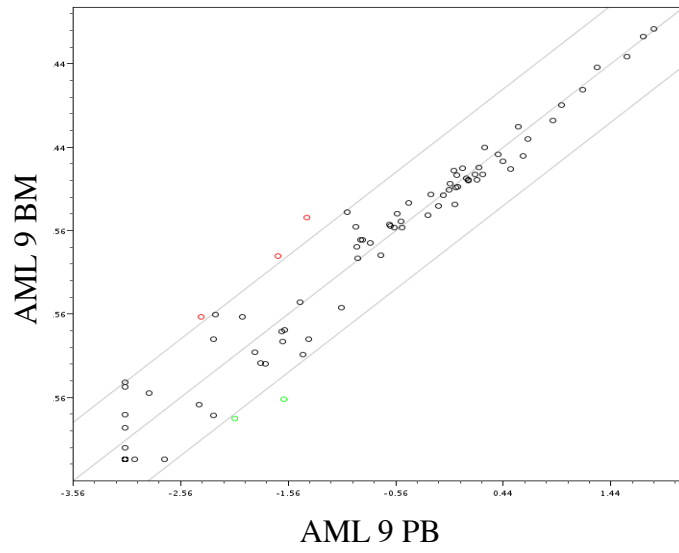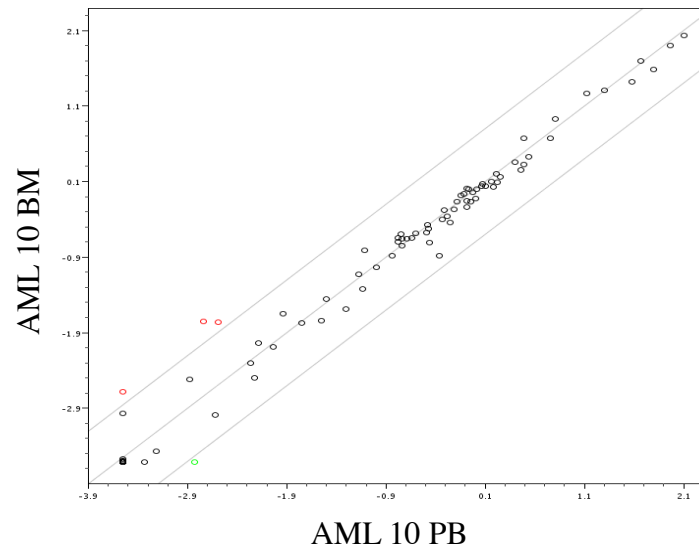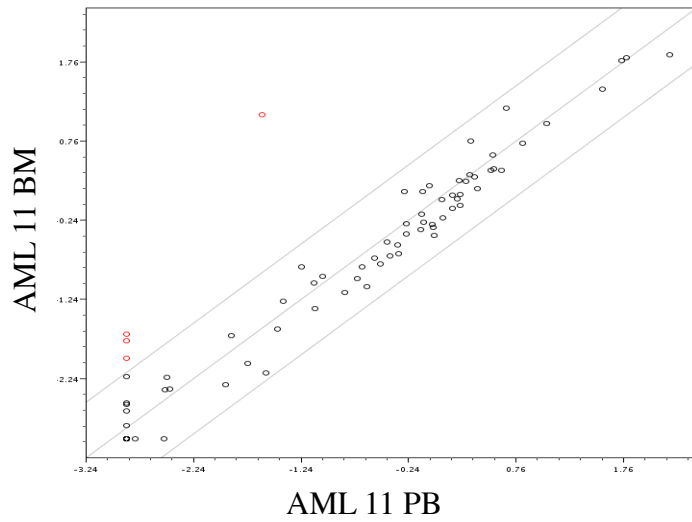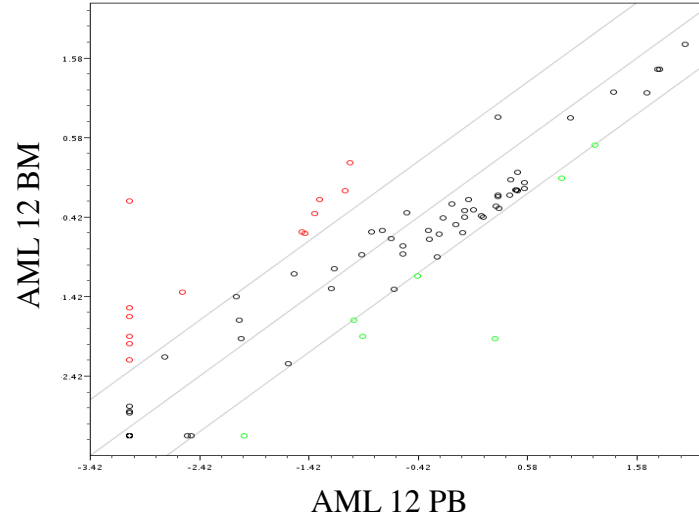

Figure S4
